# Supplementary material for: Impact of Smoking and Excess Body Weight on Overall and Site-Specific Cancer Mortality Risk
Source: Oxford University Press journal article supplement (doi:10.1158/1055-9965.epi-15-0415), 2015-07-27
Supplement: 10559965epi150415-sup-148379_1_supp_3049749_nr5v1g.docx [file 10559965epi150415-sup-148379_1_supp_3049749_nr5v1g.docx]

**Supplementary Table S2**: Baseline characteristics of the study population and figures of cancer mortality for specific cancer sites stratified by sex and smoking status

| **Sex** | | **Women** | | | | **Men** | | | |
| --- | --- | --- | --- | --- | --- | --- | --- | --- | --- |
| **Smoking status** | | **never** | **former** | **light a** | **heavy b** | **never** | **former** | **light a** | **heavy b** |
| n observations | | 11,267 | 2,382 | 3,462 | 1,698 | 5,519 | 4,044 | 3,858 | 3,473 |
| % observations | | 59.9 | 12.7 | 18.4 | 9.0 | 32.7 | 23.9 | 22.8 | 20.6 |
| n deaths from all causes | | 2,539 | 306 | 440 | 238 | 937 | 1,132 | 927 | 864 |
| % deaths from all causes∑ | | 22.5 | 12.9 | 12.7 | 14.0 | 17.0 | 28.0 | 24.0 | 24.9 |
| Person-years | | 215,076 | 43,763 | 69,796 | 32,803 | 104,270 | 71,651 | 74,794 | 64,159 |
| Mean (SD) follow-up in years | | 19.1 (7.4) | 18.4 (6.3) | 20.2 (7.2) | 19.3 (6.7) | 18.9 (7.0) | 17.7 (7.4) | 19.4 (7.8) | 18.5 (7.5) |
| Mean (SD) age in years | | 49.2 (16.8) | 44.8 (14.5) | 40.6 (14.0) | 39.9 (11.9) | 42.9 (15.7) | 51.0 (14.5) | 44.3 (15.2) | 42.1 (12.3) |
| Mean (SD) BMI in kg/m2 | | 23.9 (4.2) | 23.4 (4.0) | 22.7 (3.7) | 22.7 (3.7) | 24.8 (3.5) | 26.0 (3.5) | 24.9 (3.4) | 25.2 (3.6) |
| ***BMI categories*** | | | | | | | | | |
| % BMI < 25 | | 66.5 | 73.5 | 77.8 | 79.2 | 57.0 | 41.7 | 53.9 | 52.4 |
| % 25 ≤ BMI < 30 | | 25.0 | 20.5 | 17.5 | 16.3 | 35.5 | 46.5 | 38.5 | 39.5 |
| % BMI ≥ 30 | | 8.6 | 6.1 | 4.7 | 4.5 | 7.5 | 11.8 | 7.7 | 8.2 |
| ***Marital status*** | | | | | | | | | |
| % single | | 18.5 | 16.4 | 24.8 | 24.1 | 27.8 | 10.1 | 23.4 | 22.2 |
| % married | | 63.5 | 66.5 | 60.5 | 55.8 | 66.6 | 81.4 | 68.8 | 67.7 |
| % widowed | | 12.8 | 8.3 | 5.9 | 4.6 | 1.8 | 3.6 | 2.2 | 1.4 |
| % divorced | | 5.3 | 8.8 | 8.8 | 15.6 | 3.8 | 4.9 | 5.6 | 8.7 |
| ***Frequency of physical activity*** | | | | | | | | | |
| % daily | | 6.6 | 6.9 | 5.8 | 5.0 | 6.2 | 6.2 | 6.0 | 4.7 |
| % several times per week | | 17.9 | 25.0 | 20.3 | 16.1 | 31.9 | 25.5 | 24.7 | 18.7 |
| % once per week | | 22.8 | 25.5 | 23.8 | 18.5 | 20.6 | 19.0 | 22.1 | 17.4 |
| % less than once per week | | 52.7 | 42.7 | 50.1 | 60.4 | 41.3 | 49.3 | 47.3 | 59.2 |
| ***Other covariates*** | | | | | | | | | |
| Alcohol (% yes) | | 49.8 | 63.01 | 60.51 | 63.4 | 71.4 | 81.4 | 80.4 | 82.9 |
| Healthy diet* (% yes) | | 77.4 | 74.8 | 66.1 | 49.4 | 64.1 | 63.5 | 62.0 | 47.6 |
| Mean (SD) years of education | | 10.9 (2.9) | 11.9 (2.9) | 11.4 (2.7) | 11.4 (2.9) | 12.7 (2.5) | 12.4 (3.4) | 12.5 (3.4) | 12.0 (3.2) |
| Nationality (% Swiss) | | 85.9 | 87.6 | 82.9 | 85.3 | 83.4 | 81.4 | 80.4 | 75.9 |
| ***Cancer Mortality*** | | | | | | | | | |
| All cancer sites | n | 698 | 109 | 173 | 102 | 287 | 385 | 294 | 331 |
| % e | 27.5 | 35.6 | 39.3 | 42.9 | 30.6 | 34.0 | 31.7 | 38.3 |
| Lung cancer | n | 44 | 7 | 34 | 39 | 32 | 72 | 59 | 139 |
| % f | 6.3 | 6.4 | 19.7 | 38.2 | 11.2 | 18.7 | 20.1 | 42.0 |
| Colorectal cancer | n | 79 | 12 | 17 | 5 | 46 | 49 | 27 | 15 |
| % f | 11.3 | 11.0 | 9.8 | 4.9 | 16.0 | 12.7 | 9.2 | 4.5 |
| UADT-cancer | n | 10 | 3 | 11 | 11 | 17 | 21 | 20 | 32 |
| % f | 1.4 | 2.8 | 6.4 | 10.8 | 5.9 | 5.5 | 6.8 | 9.7 |
| Blood cancer | n | 81 | 10 | 18 | 7 | 39 | 43 | 27 | 21 |
| % f | 11.6 | 9.2 | 10.4 | 6.9 | 13.6 | 11.2 | 9.2 | 6.3 |
| Pancreatic cancer | n | 43 | 9 | 10 | 3 | 13 | 19 | 16 | 14 |
| % f | 6.2 | 8.3 | 5.8 | 2.9 | 4.5 | 4.9 | 5.4 | 4.2 |
| Bladder cancer | n | 23 | 3 | 6 | 1 | 13 | 12 | 10 | 17 |
| % f | 3.3 | 2.8 | 3.5 | 1.0 | 4.5 | 3.1 | 3.4 | 5.1 |
| Liver cancer | n | 16 | 5 | 6 | 1 | 8 | 17 | 10 | 18 |
| % f | 2.3 | 4.6 | 3.5 | 1.0 | 2.8 | 4.4 | 3.4 | 5.4 |
| Stomach cancer | n | 28 | 1 | 3 | 0 | 9 | 18 | 5 | 10 |
| % f | 4.0 | 0.9 | 1.7 | 0.0 | 3.1 | 4.7 | 1.7 | 3.0 |
| Breast cancer | n | 141 | 19 | 23 | 18 | - | - | - | - |
| % f | 20.2 | 17.4 | 13.3 | 17.7 | - | - | - | - |
| Cancer of female genitals | n | 86 | 15 | 24 | 7 | - | - | - | - |
| % f | 12.3 | 13.8 | 13.9 | 6.9 | - | - | - | - |
| Prostate cancer | n | - | - | - | - | 49 | 57 | 52 | 12 |
| % f | - | - | - | - | 17.1 | 14.8 | 17.7 | 3.6 |
| Remaining cancer deaths | n | 147 | 25 | 21 | 10 | 61 | 77 | 68 | 53 |
| % f | 21.1 | 22.9 | 12.1 | 9.8 | 21.3 | 20.0 | 23.1 | 16.0 |

a Current light smokers: smoking less than 20 cigarette equivalents a day. One pipe or cigarillo correspondent to two and one cigar to four cigarette equivalents.

b Current heavy smokers: smoking at least 20 cigarette equivalents a day.

c Percent of all observations in this smoking category.

d Defined as follows: MONICA, NRP 1A and SOMIPOPS: regularly eating three main meals per day; SHS 92/93: eating fruits and vegetables at least once per day.

e Percent of all deaths in this smoking/sex category.

f Percent of all cancer deaths in this smoking/sex category
